# Supplementary material for: Regulation of the effector function of CD8+ T cells by gut microbiota-derived metabolite butyrate
Source: PubMed Central journal article supplement (PMC6158259; doi:10.1038/s41598-018-32860-x), 2018-09-26
Supplement: 41598_2018_32860_MOESM1_ESM.pdf [file 41598_2018_32860_MOESM1_ESM.pdf]

## Supplementary Figures:

### Regulation of the effector function of CD8<sup>+</sup> T cells by gut microbiota-derived metabolite butyrate

Maik Luu<sup>1</sup>, Katharina Weigand<sup>1</sup>, Fatana Wedi<sup>1</sup>, Carina Breidenbend<sup>1</sup>, Hanna Leister<sup>1</sup>, Sabine Pautz<sup>1,2</sup>, Till Adhikary<sup>3</sup>, Alexander Visekruna<sup>1</sup>

<sup>1</sup>Institute for Medical Microbiology and Hygiene, Philipps University of Marburg, Marburg, Germany.

<sup>2</sup>Department of Biochemistry, University of Kassel, Kassel, Germany.

<sup>3</sup>Institute of Molecular Biology and Tumor Research (IMT), Center for Tumor- and Immunobiology, Philipps-University Marburg, Marburg, Germany.

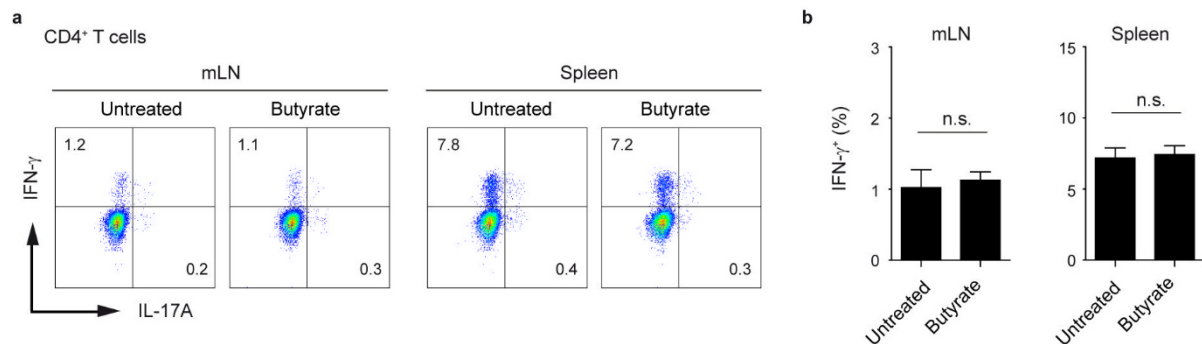

**Supplementary Figure 1.** Oral treatment of WT mice with butyrate. **(a)** Frequency of IFN- $\gamma$ <sup>+</sup> and IL-17A<sup>+</sup> CD4<sup>+</sup> lymphocytes in the spleen and mLNs four weeks after oral treatment of WT mice with 150 mM butyrate. Two experiments with five mice per group were performed. A representative of two experiments is shown. Error bars **(b)** indicate SEM; n. s. = not significant.

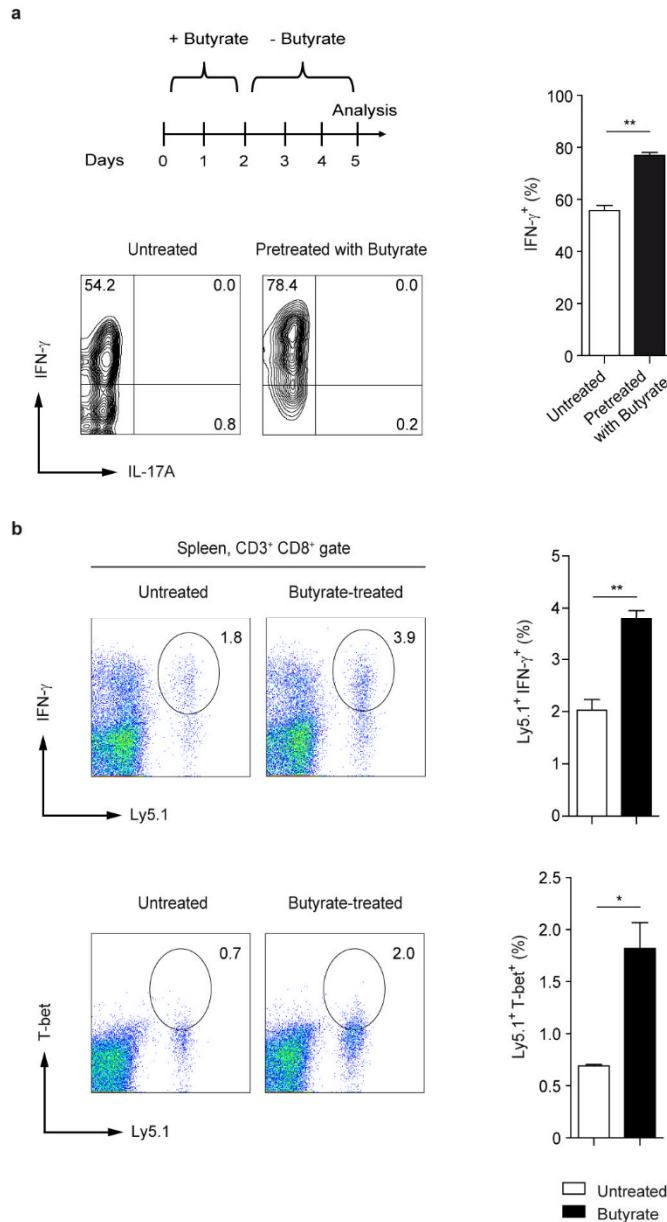

**Supplementary Figure 2.** Stability of butyrate-mediated phenotype in CTLs. **(a)** CTLs were pretreated with 1 mM butyrate. After two days of the cell culture, butyrate was removed from the supernatant and subsequently cells were cultured for next three days in the absence of butyrate. On day 5 of the cell culture, frequencies of IFN- $\gamma$ <sup>+</sup> and IL-17A<sup>+</sup> cells were measured by flow cytometry. Three experiments were performed. Data (right) are expressed as mean  $\pm$  SEM. \*\* $p < 0.01$ . **(b)** Ly5.1<sup>+</sup> CTLs were cultured for three days in the presence or absence of 1 mM butyrate.  $2 \times 10^6$  CTLs were adoptively transferred into Ly5.2<sup>+</sup> mice and ten days later, the frequency of splenic Ly5.1<sup>+</sup>IFN- $\gamma$ <sup>+</sup> (upper panel) and Ly5.1<sup>+</sup>T-bet<sup>+</sup> cells (lower panel) was analyzed within CD3<sup>+</sup>CD8<sup>+</sup> gate. Two experiments were performed. Results (right) are expressed as mean  $\pm$  SEM. \* $p < 0.05$ , \*\* $p < 0.01$ .

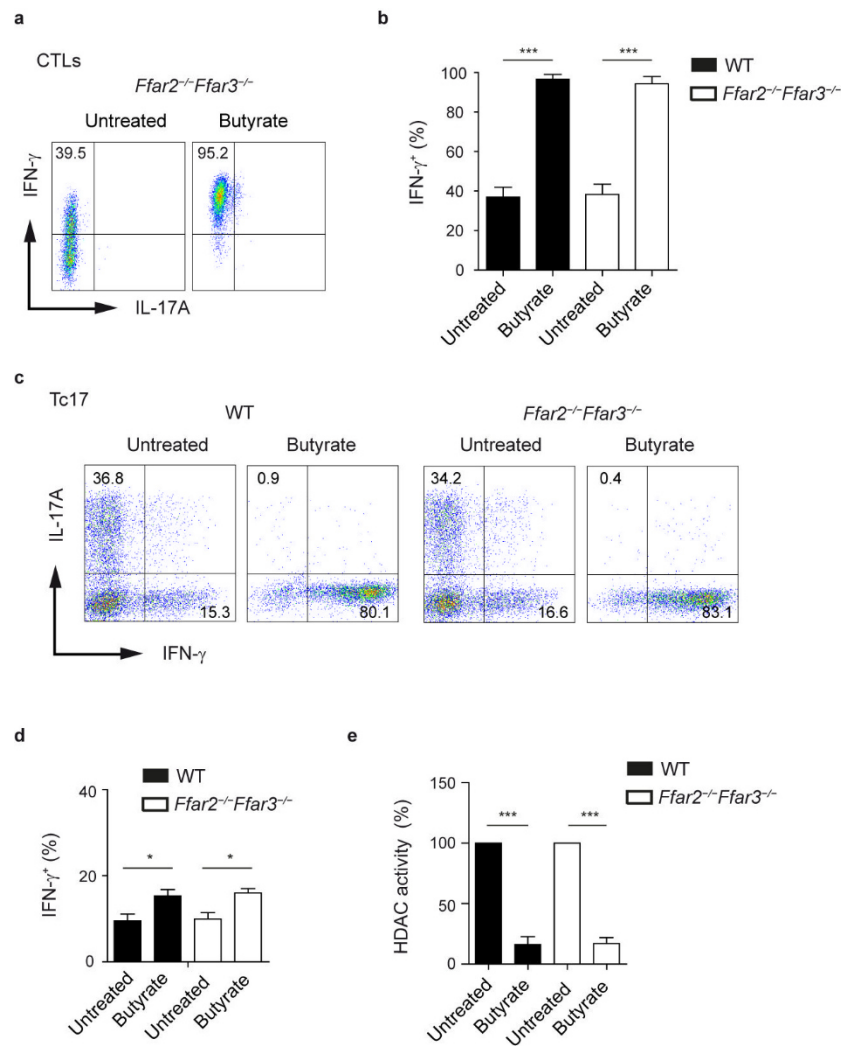

**Supplementary Figure 3.** Butyrate-mediated effects on CD8<sup>+</sup> T cells are independent of GPR41 and GPR43. **(a-c)** Frequency of IFN- $\gamma$ <sup>+</sup> and IL-17A<sup>+</sup> cells within CTLs and Tc17 cells deficient for SCFA receptors GPR41 and GPR43. Cells were treated with 1 mM sodium butyrate for three days. As a control, WT CTLs **(b)** and Tc17 cells **(c)** were used. Three similar experiments were performed. **(d)** *Ffar2<sup>-/-</sup>Ffar3<sup>-/-</sup>* and WT mice (n = 5 mice per group) were orally treated with 150 mM butyrate for four weeks. Frequency of IFN- $\gamma$ <sup>+</sup>CD8<sup>+</sup> T cells in mLNs was determined by FACS analysis. **(e)** HDAC activity was performed on the cell lysates derived from *Ffar2<sup>-/-</sup>Ffar3<sup>-/-</sup>* and WT CTLs in the presence or absence of 5 mM butyrate. Results **(b, d and e)** are expressed as mean  $\pm$  SEM. \*p < 0.05, \*\*\*p < 0.001.

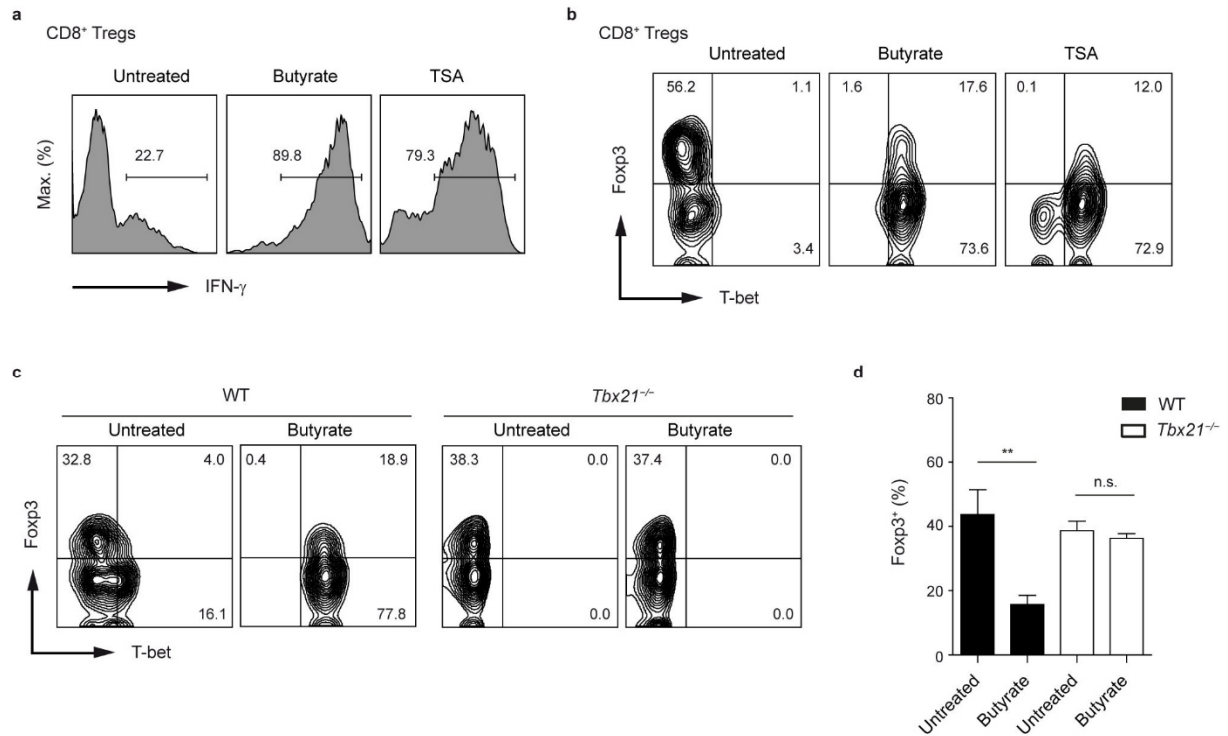

**Supplementary Figure 4.** Impact of butyrate and TSA on CD8<sup>+</sup> T cells cultured under Treg-inducing conditions. **(a and b)** WT CD8<sup>+</sup> T cells were cultured under Treg-inducing conditions for three days in the presence of 1 mM sodium butyrate or 10 nM TSA. The frequency of IFN- $\gamma$ <sup>+</sup> **(a)**, or Foxp3<sup>+</sup> and T-bet<sup>+</sup> **(b)** cells within CD8<sup>+</sup> Tregs was analyzed by flow cytometry. Representatives of three similar experiments are shown. **(c and d)** CD8<sup>+</sup> T cells derived from WT and T-bet-deficient mice were cultured under Treg-inducing conditions for three days. On day three of the cell culture, the intracellular staining for Foxp3 and T-bet was performed. Results **(d)** are expressed as mean  $\pm$  SEM. n. s. = not significant, \*\* $p < 0.01$ .

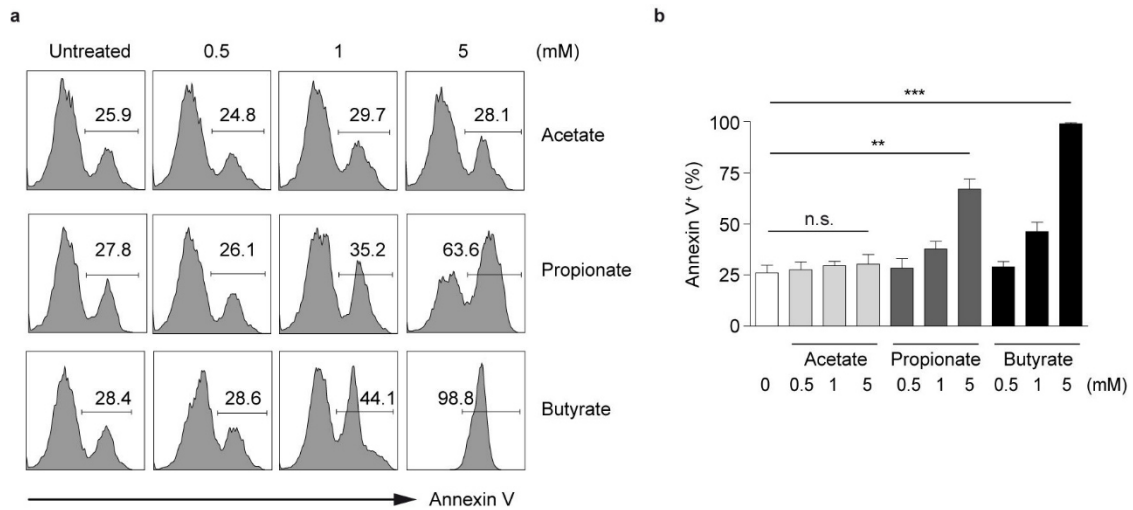

**Supplementary Figure 5.** Butyrate and propionate increase apoptosis in CD8<sup>+</sup> T cells. **(a and b)** WT CTLs were cultured for three days in the presence of increasing SCFA concentrations. The frequency of annexin V<sup>+</sup> cells was analyzed by flow cytometry. A representative of three experiments is shown **(a)**. Results **(b)** are expressed as mean  $\pm$  SEM. n. s. = not significant, \*\* $p$  < 0.01, \*\*\* $p$  < 0.001.

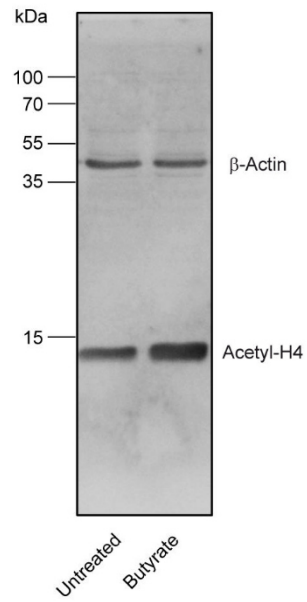

**Supplementary Figure 6.** Original full-length blot of data shown in Figure 3C. Acetyl-H4 and  $\beta$ -Actin signals were detected on the same blot membrane. PageRuler Prestained Protein Ladder (Thermo Scientific) was used to determine the size of stained proteins.
